# Supplementary material
Source: PubMed Central journal article supplement (PMC3911139)
Supplement: JB.00776-13_zjb999092962so1.pdf [file JB.00776-13_zjb999092962so1.pdf]

**Adam Hopkins, Grant Buchanan and Tracy Palmer.**

**The role of the twin arginine protein transport pathway in the assembly of the *Streptomyces coelicolor* cytochrome *bc*<sub>1</sub> complex**

**Supplementary Information.**

*XhoI BamHI*

ctc**gaggat**ccaccgccttccgcccgaacggcggggtccgggcacgccaaccctcctgtggctgtggccggcc  
accgccgtcaccttcggaccccgtggagccgctcccggttccacggggtccgaaggtgtgatgagcaggctgcgc  
cttcctcgcgcccgaaggtacgagttgatgaccttgtttatccgcatctgaccaattttgatcgttacggg  
gtgtgactcgggcccacgcggttgggctaacgctcttgggaacaacacgatgacctaagaggtgacagccgcg  
agggatacggagccggttcacggcgctgtgcatctccccggccccgcccgcaccgtcggcccattcccagccgg  
tggtcggcccctgtccgcccgtggacggggccgaagccggtttttcaacgttccgagaggttgttccat**ATG**aaaa  
agctctccgcacgacgacgccatccgctggcgccctcgtcgtcctactcctcgcgctggcatgcacaggggggc  
tgtacgcgcggttcgcaccccgcgagcaaggcgcagggccgatgaatccgcccagtcctcgcctcgcagggca  
agaagctctacgcccgtcggctgtgccagttgccacggcaccggagggcagggcaccagtgacgggtccgagcctgg  
tcggcgtaggcgcgcggccgctcgaacttcaggtgggcaccggccgcatgccggcccagcagcccggcgcgagg 750  
tcccgaagaagaaggtcatctactcccaggcggagatcgaccagctcgcggcgtacatcgcgtcgtgggcgccc  
gtccggcgatcccctcggaggagaagtacggccccgagggcgcggacatcgccaaggggtggtgagctgttccgca  
ccaactgcgcgcagtgccacaacttcaccggcaagggcggcgccctgacgcacggcaagtagcgcgagcctGg  
aggggtgtcgaaccgaagcacatctacgaggccatgcagaccggccccgcagaacatgccctccttccccgacacca  
cgctgtcggagcagaacaagaaggacatcatcgctacctggacgcggtcaacgggtgacgacaccgagagccccg  
gtgggtctcagcctcggcggactcggccccggtcagtgaggggtctgttcgctgggtgttcggactgggcgcgctga

*BsiWI*

tcgcccgtcgcgctctgggtcgcgctcg**TacGg**caaaggccaagaagt**caggc**caccaccaccaccaccacc

*BsiWI*

accaccact**tg**agtcgcccgtccg**TacGg**caaaggccaagaagtc**ATG**agtagccaagacattccagaagagaacct  
gccggcagagcaggaccgcccgcacggcgcggccgcccggcccgcggacgagaccaaccggttcgcccaccggg  
tctgcccggccacgagccgcccgtccaggacgtcgcagagcggccgccaagcgggtccgagcgcacgggtcgcct 1500  
gctgttacgctgtcgatgctggccaccatcgccttcatcgcgccttcgtggcgatcgcgctcacaagtccgt  
ctacatcttcccgtcgggtcacatcagtcgctgaacttcgctcggcatgacgctcggcgtcgcgctgttcgc  
catcggcgcgggcccgggtccactgggcccgcaccctgatgtccgacgaggaggtcggcagcagcgtcaccgat  
cgagggcgtccccgaggtccgtgccaaggtccacgcggacttcaagcaggggtccaaggagtccgtgatcgggcg  
ccgcaagctgatccgcaacacgatgctgggcccgcctcaccctggtgccgctctccggcgtcgtcctgctgcgcga  
cctcgggtccgctgcccgggaccaagctccgccacaccctgtggtccaagggcaagctcctcgtcaacatgaacac  
caacgagccgctgcgtccctccgacgtcgcgggtgggctcgtcaccttcgcatgcccgagggcctggaggagca  
cgacgaggacttccagaacgagatcgccaagggcccctgatgatcatccggctggagccggactccatcaagga  
caagcgcgagctGgagtggtcgcacgagggcatcgtggcgtactcgaaAatctgcaccacgctcgggttcccgat  
ctccctgtacgagcagcagacgcaccacgcgctctgcccctgccaccagtccaccttcgaccttgccgacgggtgc 2250



gene are capitalized and shown in bold underline, stop codons are given in bold lower case. Deca-histidine coding sequences are shown in italic underline. Silent mutations in the sequence to remove or add restriction sites are capitalized plain font. The *hrdB* promoter region covers nucleotides 12 – 443, the *qcrC<sub>his10</sub>* coding sequence covers nucleotides 444 – 1286, the *qcrA<sub>his10</sub>* coding sequence covers nucleotides 1319 – 2416 and the *qcrB<sub>his10</sub>* coding sequence covers nucleotides 2449 – 4119.

QcrA

1 **mssqdipeen** **lpaeqdrphg** **aaarpadetn** **pfadpglpph** **eprvqdvder** **aakrsertva**  
61 llftlsm lat iafiaafvai dvdksvyifp lghisalnf a lgmtlgvalf aigagavhwa  
121 **rtlmsdeeva** **derhpieasp** **evrakvhadf** **kqgakesvig** rrkli**rntml** **galtlvplsg**  
181 **vvllrdlgpl** **pgtklrhtlw** **skgkllvnmn** **tneplrpsdv** **avgsltfamp** **egleehdedf**  
241 **qneiakaalm** **iirlepdsik** **dkrelewshe** **givayski**ct hvgcpislye qqthhalcpc  
301 hqstfdladg **arvifgpagh** **alpqlrigvn** **degylealgd** **feepvgpayw** **erg**

QcrB<sub>His10</sub>

1 **mstaanepsr** **srgkapager** **vadwadgrlg** **iyslakanmr** **kifpdhwsfm** lgevclysfi  
61 iiiltgvylt lffhpsmaev eyhgsvvplq gqmmseayas tldisfdvrg gllirqihhw  
121 aaliflagmf vhmm**rvfftg** **afrk**prevnw lfgflllvlg mftgftgysl pddllsgtgi  
181 rfmegailsv pivgtyisff lfggefpghd fvsrfysihi lllpgimlg l lvghlilvfy  
241 **hkhtqfagpg** **ktknvvgmp** **llpvytaka**g gffflvfgvi svvsaiatin piwaigpyrp  
301 dqvstgaqpd wymgfsegli rvmpgweina wghtlvlgvf vpllifplvl aaiavypfie  
361 swvtgdk**reh** **hildrprnap** trtafgvawl tvyfvlligg gndl wathfh lsinaitwfv  
421 **riaaffvgpv** **afiatkricl** **glqrrdkdkv** lhg**resgiik** **rlphgefiev** **heplsqeqlh**  
481 **tltahegyqp** **aeigptvden** **gverkvsqtq** **klraklsesy** **ygeesqipkp** **tveeyke**its  
541 ghghhghhhh hhhhh

QcrC

1 mkklsarr rh plaalvlll alactgglya afapaskaqa desaqslaid egkklyavgc  
61 aschgtgggg tsdgpslv gv gaaavdfqvg tgrmpaqppg aqvpkkkviy sqaaidqlaa  
121 yaslgagpa ipsee**kygpe** **gadiakggel** ftrncaqchn ftgkggalth **gkyapslegv**  
181 **dpkhi**yeamq tgpqnmpsf p dttlseqnkk diiayldavn gddtespggl slgglgpvse  
241 glfawvfglg aliavavwva artakakks

Figure S2. Identification of purified cytochrome  $bc_1$  complex components by tryptic peptide mass fingerprinting. Recovered peptides are given in red, while predicted transmembrane helices are underlined. The coverage QcrA, for His-tagged QcrB, the Rieske protein and QcrC are 36%, 67% and 9%, respectively.
